# Supplementary material for: A combined plastic shaping method for powder metallurgy complex multi-material structures
Source: Royal Society of Chemistry journal article supplement (doi:10.1039/d5mh00461f), 2025-01-01
Supplement: d5mh00461f1.pdf [file d5mh00461f1.pdf]

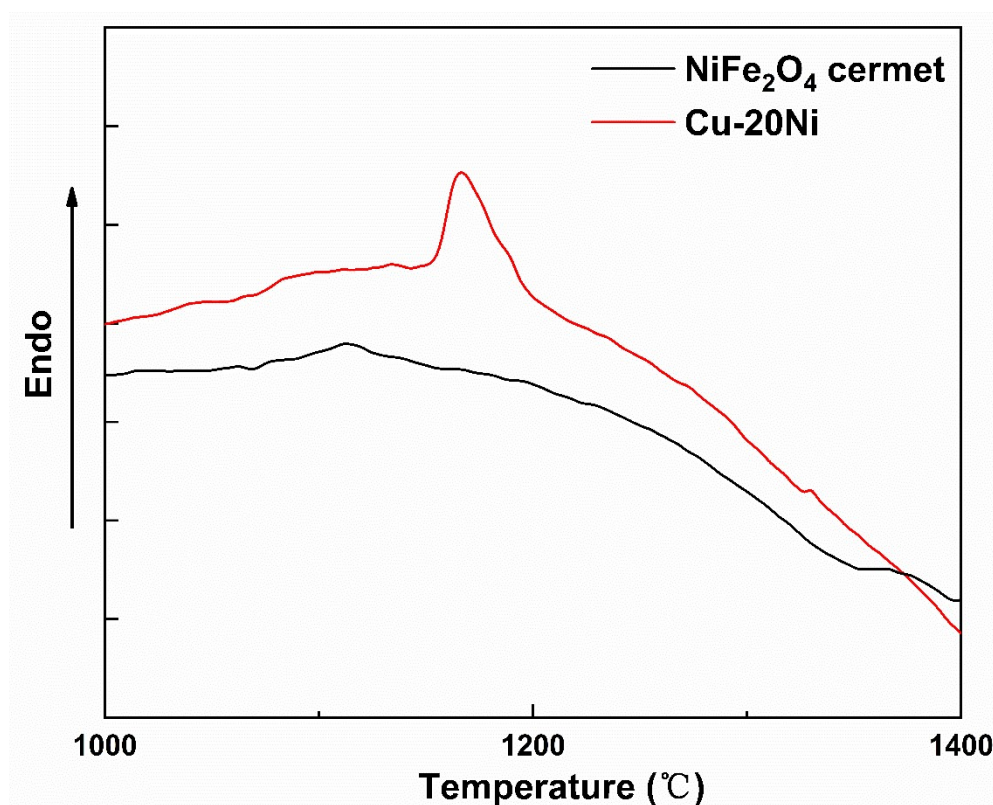

Fig. S1 DSC result of cermet and alloy

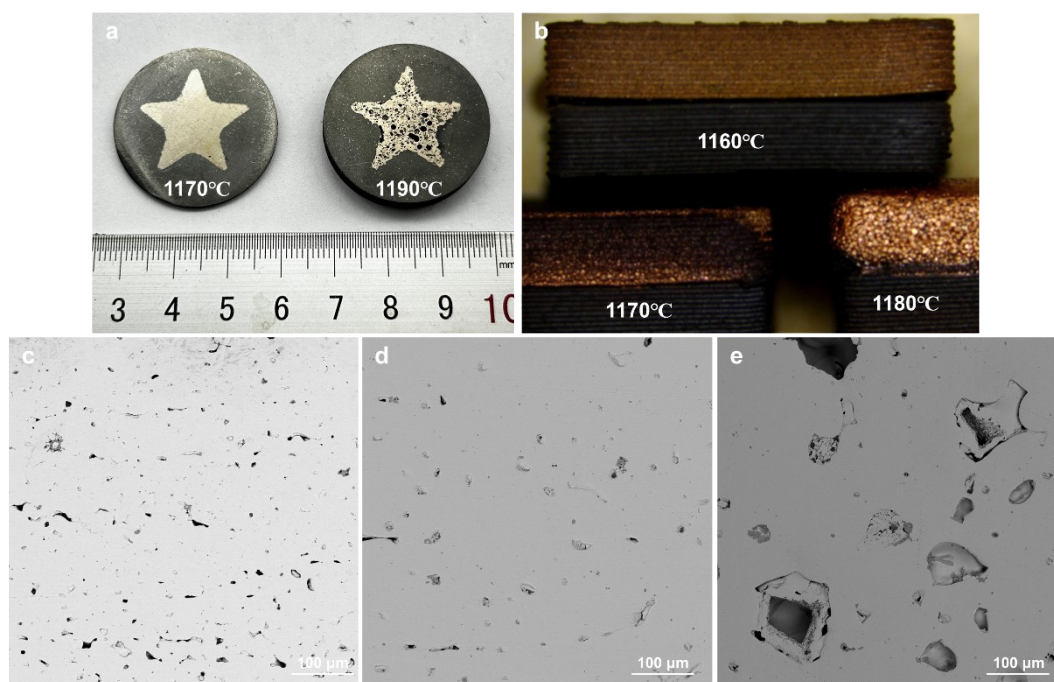

Fig. S2 SLPS co-sintered samples sintered from 1160 °C to 1190 °C (a) Macro-morphology samples prepared via CPS; (b) Macro-morphology samples prepared via

PEP; Microstructure of alloy phases sintered at (c) 1160°C, (d) 1170°C, (e) 1180°C.

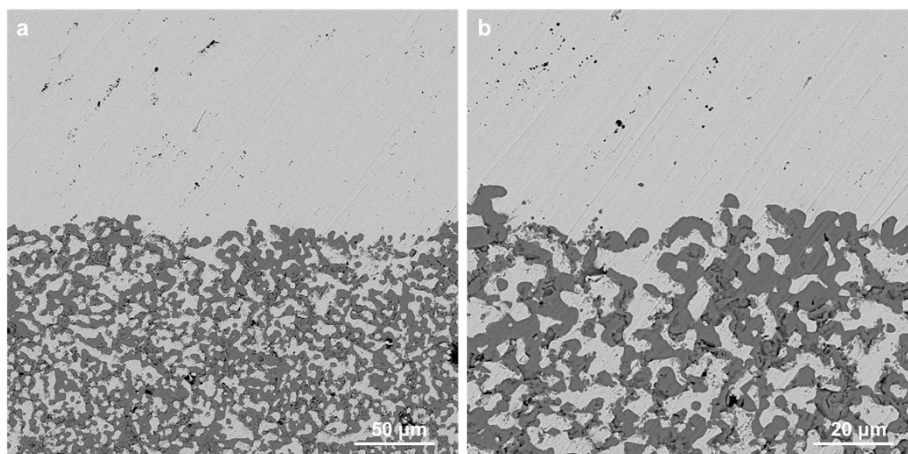

Fig. S3 Higher magnification of interface micromorphology of multi-layered structure.

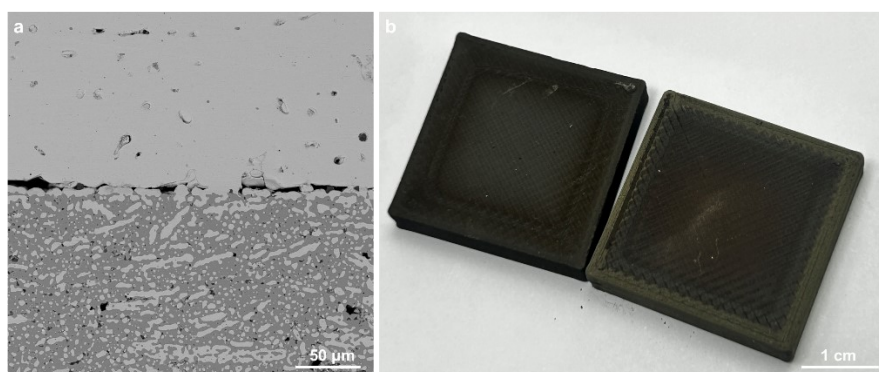

Fig. S4 PEP-made multi-layered structure. (a) Microstructure of multi-layered the cermet/alloy interface prepared via PEP; (b) Multi-layered structure prepared via PEP (The layered structure separated directly during debinding).
